# Supplementary material for: Cell Density-Dependent Fibroblast Growth Factor-2 Signaling Regulates Syndecan-4 Expression in Cultured Vascular Endothelial Cells
Source: PubMed Central journal article supplement (PMC7279341; doi:10.3390/ijms21103698), 2020-05-24
Supplement: ijms-21-03698-s001.pdf [file ijms-21-03698-s001.pdf]

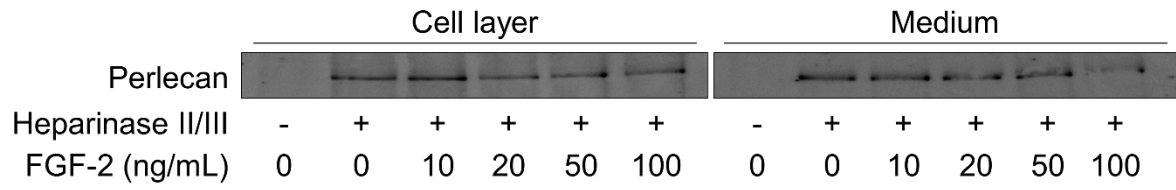

1 **Supplemental figure 1.** Dose-dependent effects of FGF-2 on perlecan core protein expression in dense  
2 and sparse cultures of vascular endothelial cells. Dense vascular endothelial cells were treated with  
3 FGF-2 at 10, 20, 50, 100 ng/mL at 37 °C for 8 h.
